# Supplementary material for: Combination of 2D/3D Ligand-Based Similarity Search in Rapid Virtual Screening from Multimillion Compound Repositories. Selection and Biological Evaluation of Potential PDE4 and PDE5 Inhibitors
Source: PubMed Central journal article supplement (PMC6270928; doi:10.3390/molecules19067008), 2014-05-28
Supplement: molecules-19-07008-s001.pdf [file molecules-19-07008-s001.pdf]

# Supplementary Materials

**Table S1.** PDE5 inhibitor reference compounds (44).

| PDE5 reference compounds |           |            |             |
|--------------------------|-----------|------------|-------------|
| ID                       | Structure | Name       | CAS number  |
| 1                        |           | verdanafil | 224785-90-4 |
| 2                        |           | Udenafil   | 268203-93-6 |
| 3                        |           | Tadalafil  | 171596-29-5 |
| 4                        |           | Sildenafil | 139755-83-2 |
| 5                        |           |            |             |
| 6                        |           |            |             |
| 7                        |           | Avanafil   | 330784-47-9 |

Table S1. Cont.

| PDE5 reference compounds |                                                                                     |                 |             |
|--------------------------|-------------------------------------------------------------------------------------|-----------------|-------------|
| ID                       | Structure                                                                           | Name            | CAS number  |
| 8                        | 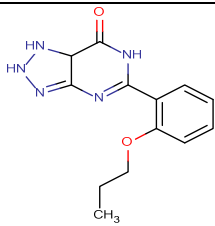   | Zaprinast       | 37762-06-4  |
| 9                        |    |                 |             |
| 10                       |   | gisendafil      | 334826-98-1 |
| 11                       |  | sulindac sulfon |             |
| 12                       |  |                 |             |
| 13                       |  |                 |             |
| 14                       |  |                 |             |

Table S1. Cont.

| PDE5 reference compounds |                                                                                     |            |             |
|--------------------------|-------------------------------------------------------------------------------------|------------|-------------|
| ID                       | Structure                                                                           | Name       | CAS number  |
| 15                       | 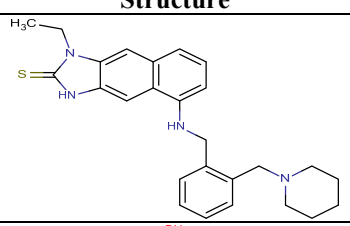   |            |             |
| 16                       |    |            |             |
| 17                       |   |            |             |
| 18                       |  | Desantafil | 569351-91-3 |
| 19                       |  |            | 200803-37-8 |
| 20                       |  |            | 257892-33-4 |

Table S1. Cont.

| PDE5 reference compounds |                                                                                     |                               |             |
|--------------------------|-------------------------------------------------------------------------------------|-------------------------------|-------------|
| ID                       | Structure                                                                           | Name                          | CAS number  |
| 21                       | 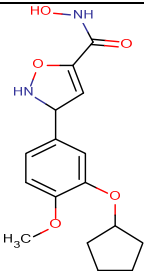   |                               | 223919-71-9 |
| 22                       |    | Ariflo; Cilomilast; SB 207499 | 153259-65-5 |
| 23                       |   | Arofylline                    | 136145-07-8 |
| 24                       |  | Cipamfylline                  | 132210-43-6 |
| 25                       |  | Lixazinone                    | 94192-59-3  |
| 26                       |  |                               | 79030-08-3  |
| 27                       |  |                               |             |
| 28                       |  |                               |             |

Table S1. Cont.

| PDE5 reference compounds |                                                                                     |      |            |
|--------------------------|-------------------------------------------------------------------------------------|------|------------|
| ID                       | Structure                                                                           | Name | CAS number |
| 29                       | 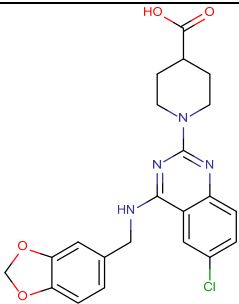   |      |            |
| 30                       |    |      |            |
| 31                       |   |      |            |
| 32                       |  |      |            |
| 33                       |  |      |            |
| 34                       |  |      |            |
| 35                       |  |      |            |

Table S1. Cont.

| PDE5 reference compounds |                                                                                     |      |            |
|--------------------------|-------------------------------------------------------------------------------------|------|------------|
| ID                       | Structure                                                                           | Name | CAS number |
| 36                       | 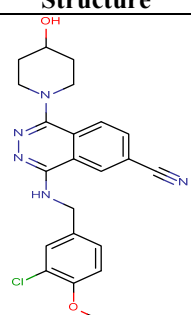   |      |            |
| 37                       |    |      |            |
| 38                       |   |      |            |
| 39                       |  |      |            |
| 40                       |  |      |            |
| 41                       |  |      |            |
| 42                       |  |      |            |

Table S1. Cont.

| PDE5 reference compounds |                                                                                   |      |            |
|--------------------------|-----------------------------------------------------------------------------------|------|------------|
| ID                       | Structure                                                                         | Name | CAS number |
| 43                       | 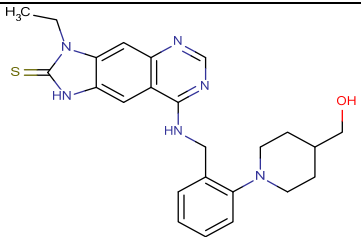 |      |            |
| 44                       |  |      |            |

Table S2. PDE4 inhibitor reference compounds (44).

| PDE4 reference compounds |                                                                                     |
|--------------------------|-------------------------------------------------------------------------------------|
| ID                       | Structure                                                                           |
| 1                        | 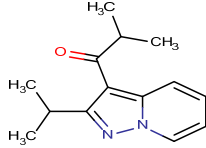 |
| 2                        |  |
| 3                        |  |
| 4                        |  |

Table S2. Cont.

| PDE4 reference compounds |                                                                                               |
|--------------------------|-----------------------------------------------------------------------------------------------|
| ID                       | Structure                                                                                     |
| 5                        | 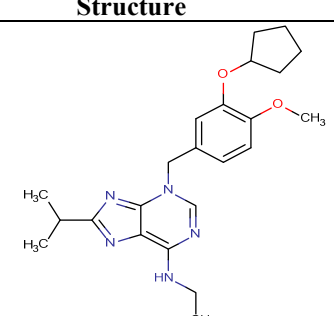 <p>HCl</p> |
| 6                        |              |
| 7                        |            |
| 8                        |            |
| 9                        |            |
| 10                       |            |
| 11                       |            |



Table S2. Cont.

| PDE4 reference compounds |                                                                                     |
|--------------------------|-------------------------------------------------------------------------------------|
| ID                       | Structure                                                                           |
| 12                       | 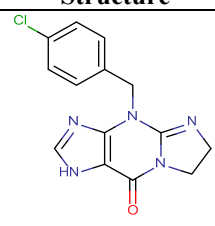   |
| 13                       |    |
| 14                       |    |
| 15                       |  |
| 16                       |  |
| 17                       |  |
| 18                       |  |
| 19                       |  |

Table S2. Cont.

| PDE4 reference compounds |                                                                                      |
|--------------------------|--------------------------------------------------------------------------------------|
| ID                       | Structure                                                                            |
| 20                       | 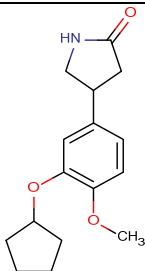    |
| 21                       |    |
| 22                       |    |
| 23                       |   |
| 24                       |  |
| 25                       |   |
| 26                       |   |
| 27                       |  |

Table S2. Cont.

| PDE4 reference compounds |                                                                                     |
|--------------------------|-------------------------------------------------------------------------------------|
| ID                       | Structure                                                                           |
| 28                       | 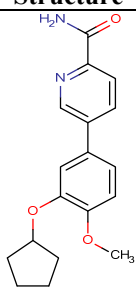   |
| 29                       |   |
| 30                       |  |
| 31                       |  |
| 32                       |  |
| 33                       |  |

Table S2. Cont.

| PDE4 reference compounds |                                                                                     |
|--------------------------|-------------------------------------------------------------------------------------|
| ID                       | Structure                                                                           |
| 34                       | 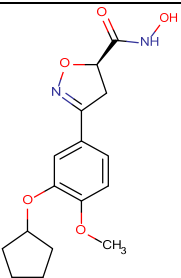   |
| 35                       |    |
| 36                       |   |
| 37                       |  |
| 38                       |  |
| 39                       |  |
| 40                       |  |

Table S2. Cont.

| PDE4 reference compounds |                                                                                     |
|--------------------------|-------------------------------------------------------------------------------------|
| ID                       | Structure                                                                           |
| 41                       | 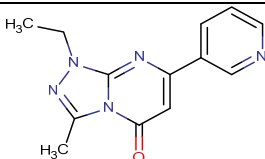   |
| 42                       |    |
| 43                       |   |
| 44                       |  |
